# Supplementary material
Source: PubMed Central journal article supplement (PMC7329183)
Supplement: 07_supplementary_figures_1-16_tfaa023.pdf [file 07_supplementary_figures_1-16_tfaa023.pdf]

# Supplementary Figure 1

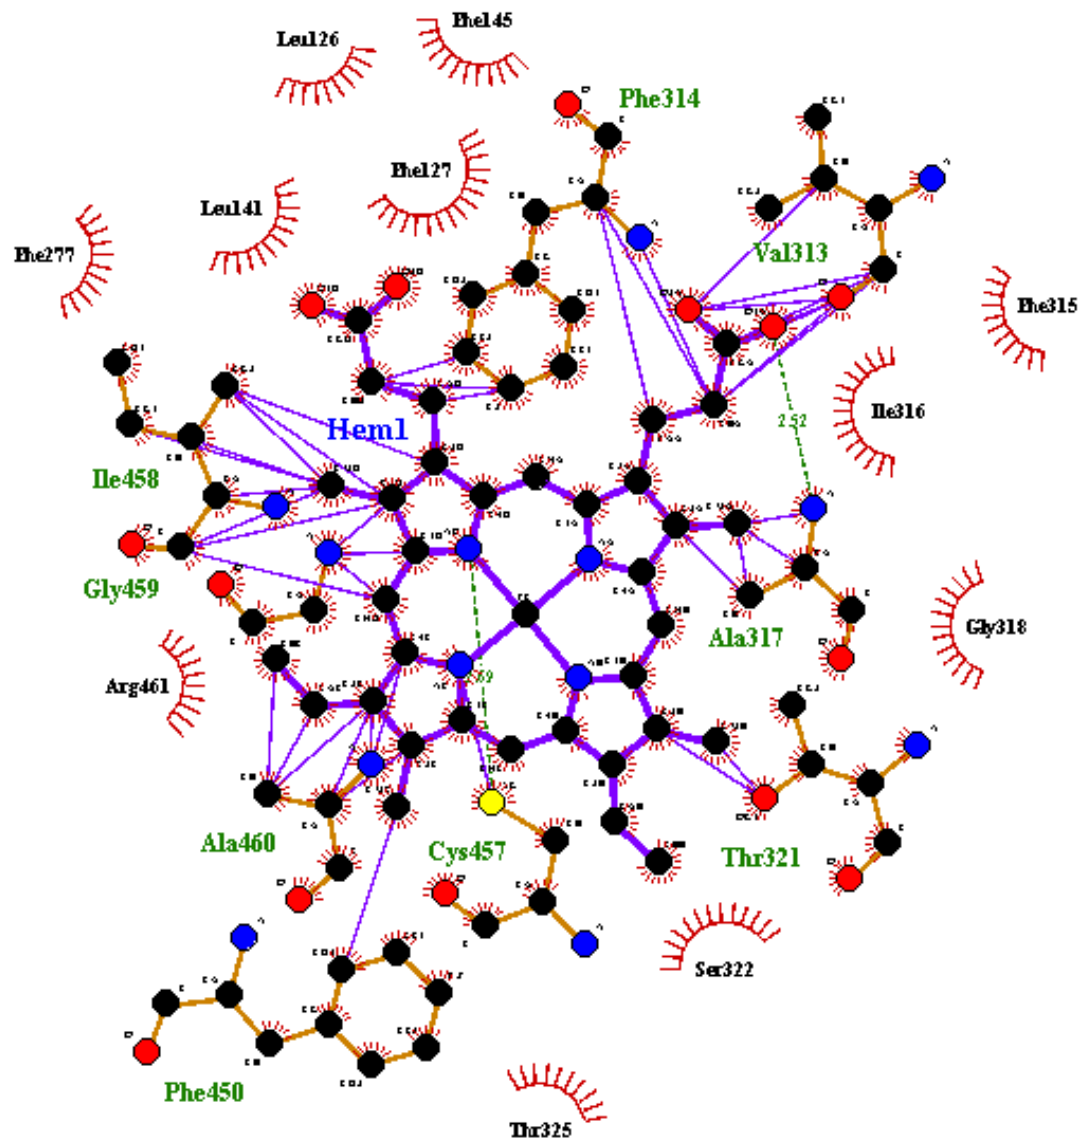

CYP6BK2\_Heme\_Model\_Q1

## Supplementary Figure 2

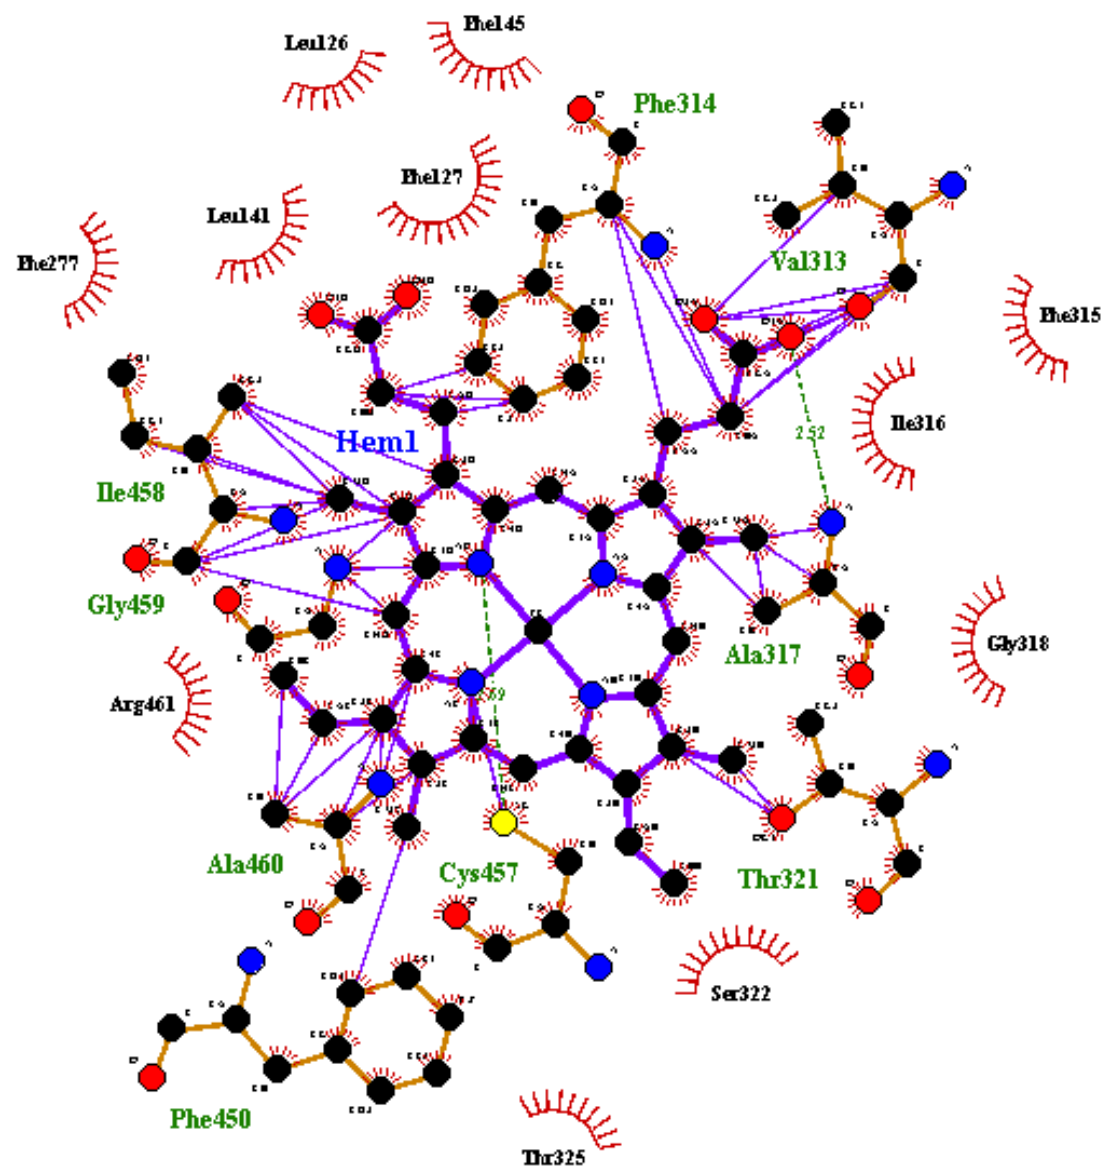

CYP6BK2\_Heme\_Model\_paroaxan

# Supplementary Figure 3

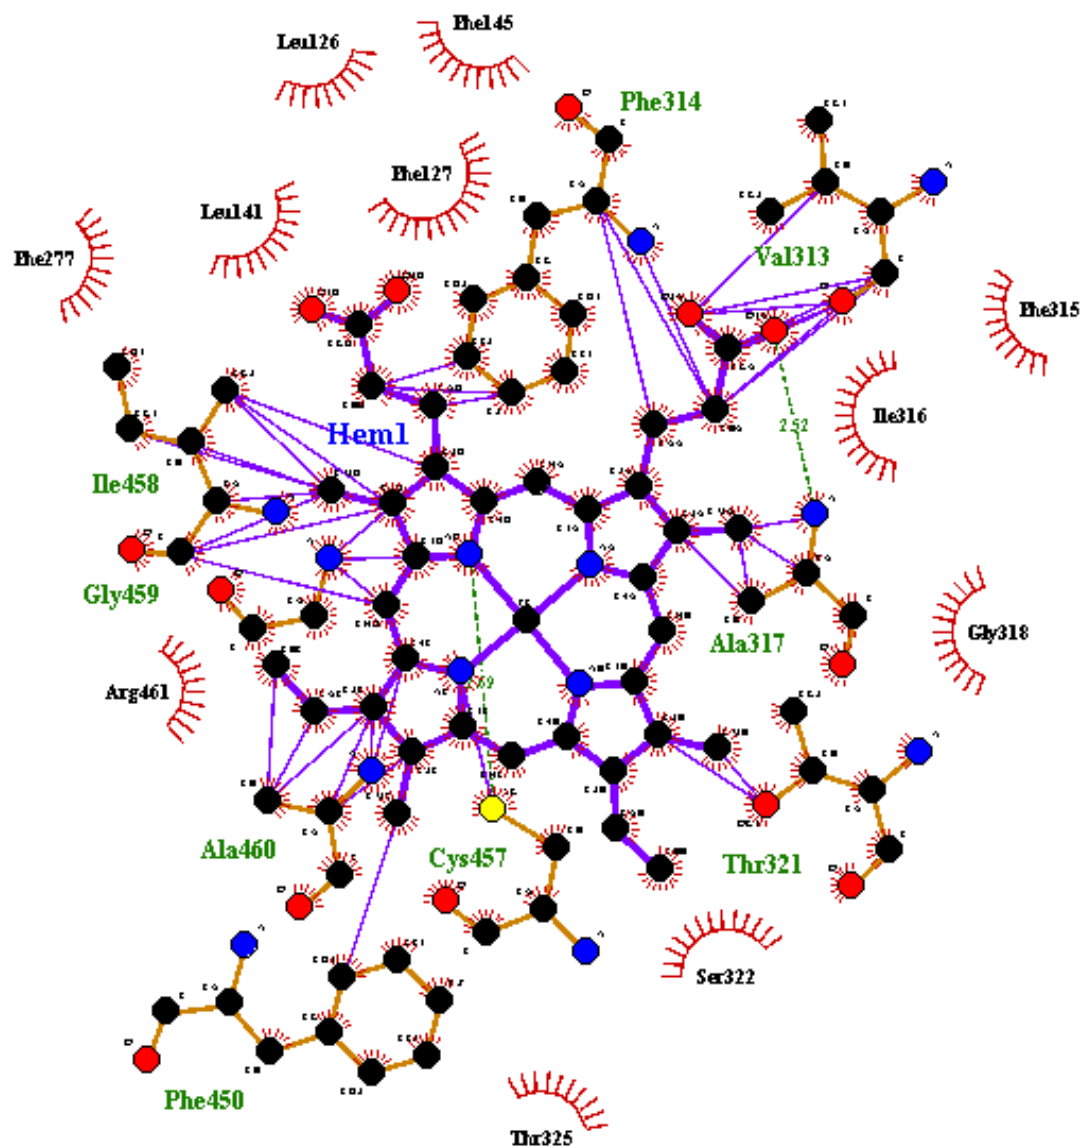

CYP6BK2\_Heme\_Model\_TEPP

# Supplementary Figure 4

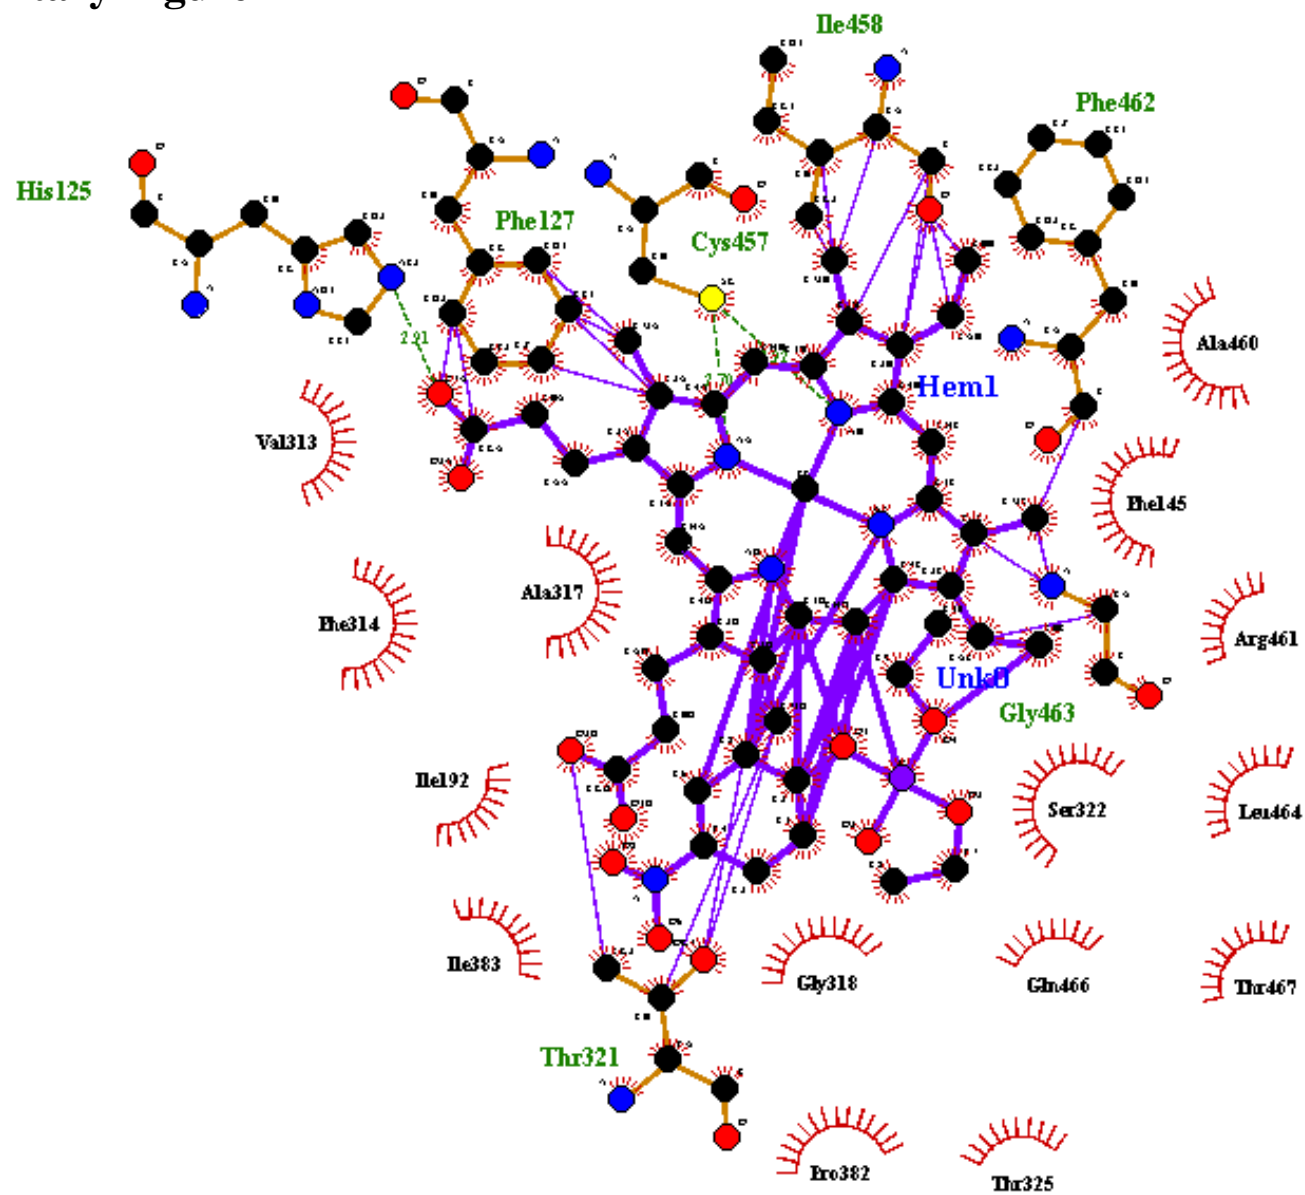

CYP6BK3\_Heme\_Model\_paroaxan

# Supplementary Figure 5

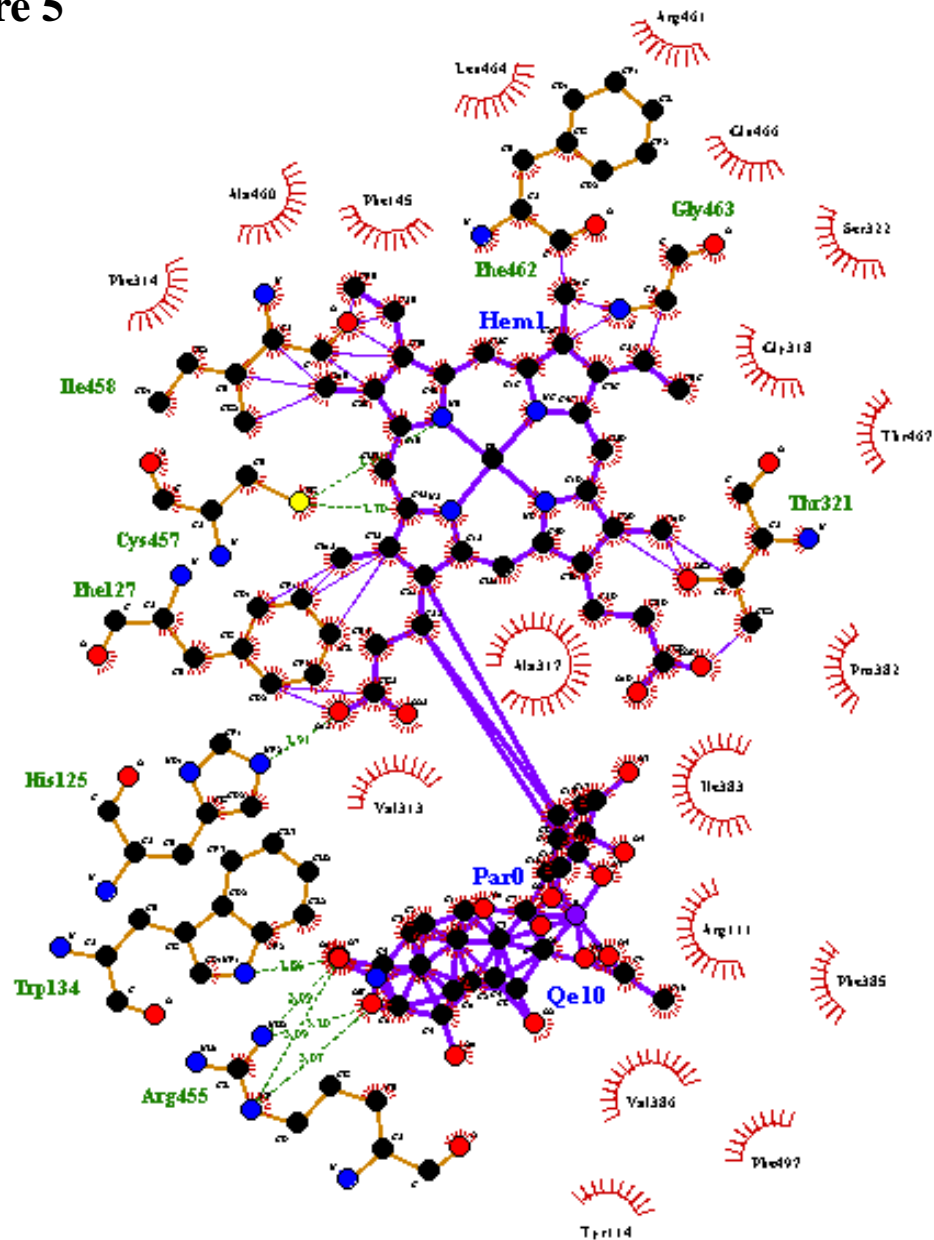

CYP6BK3\_Heme\_Model\_Q1 TD Paraoxon



# Supplementary Figure 7

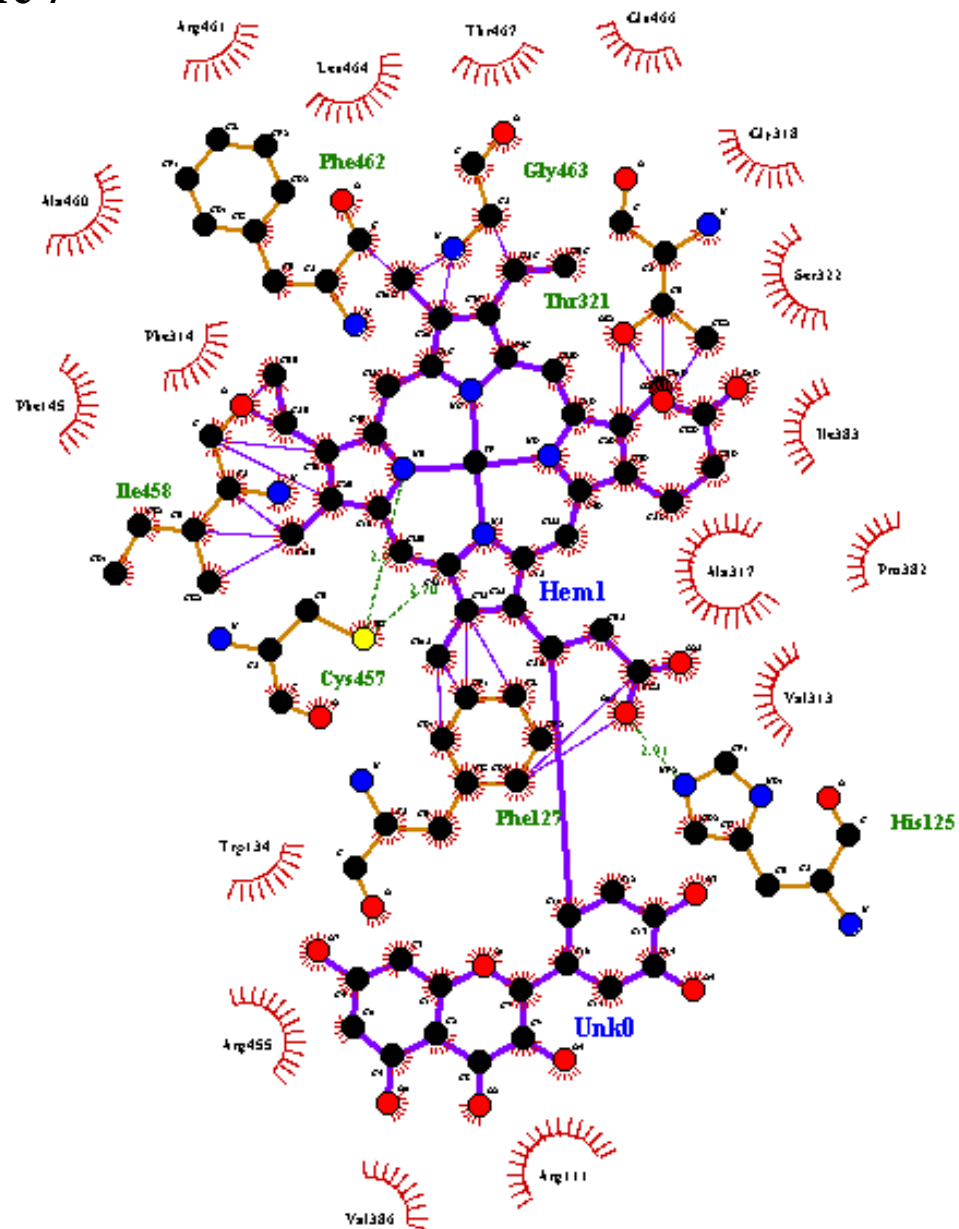

CYP6BK3\_Heme\_Model\_Q1

# Supplementary Figure 8

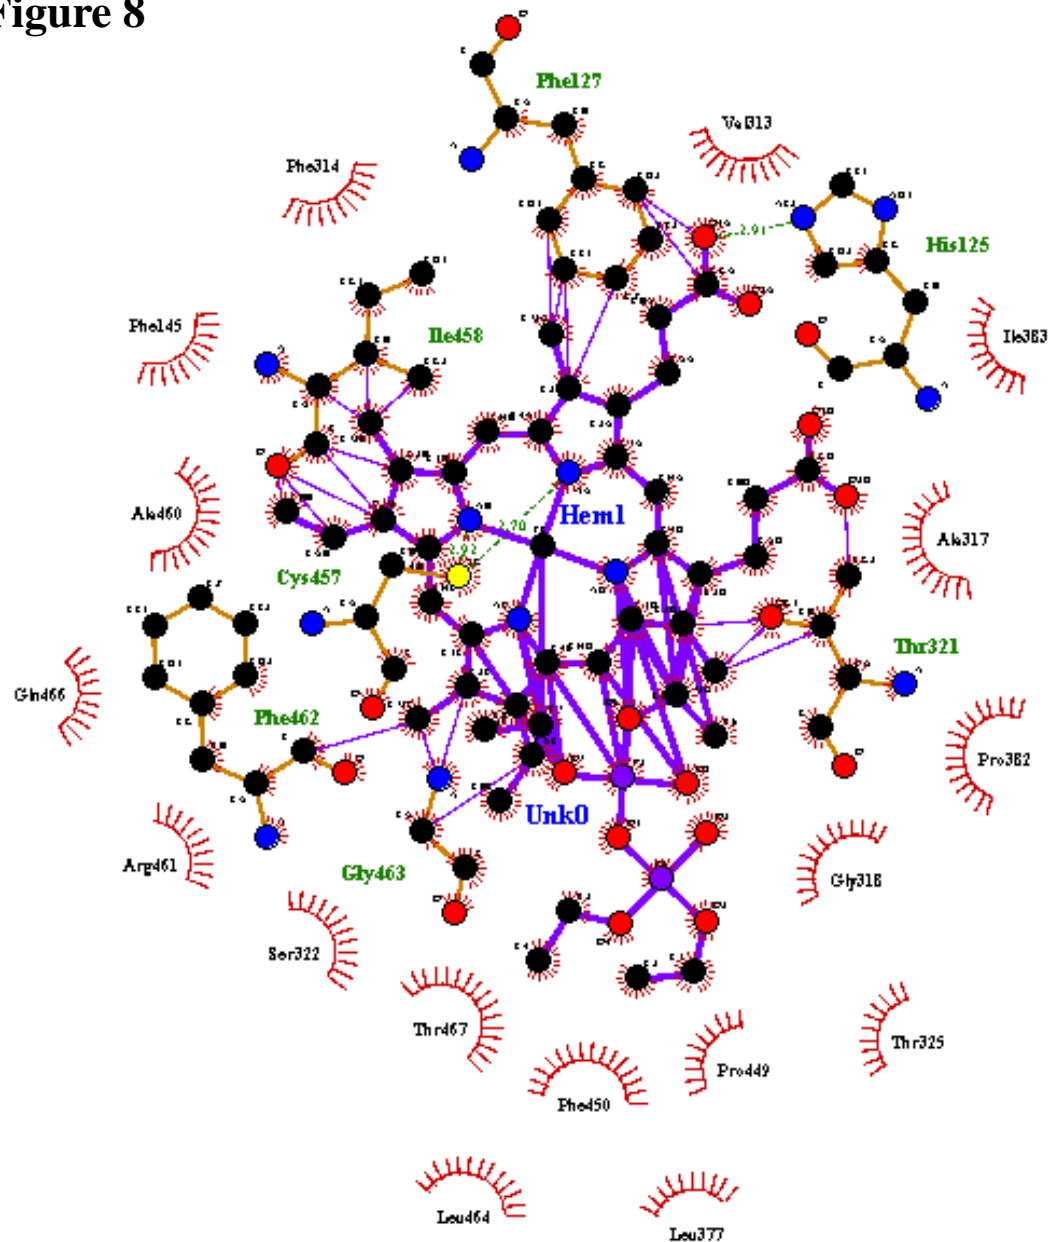

CYP6BK3\_Heme\_Model\_TEPP





# Supplementary Figure 10

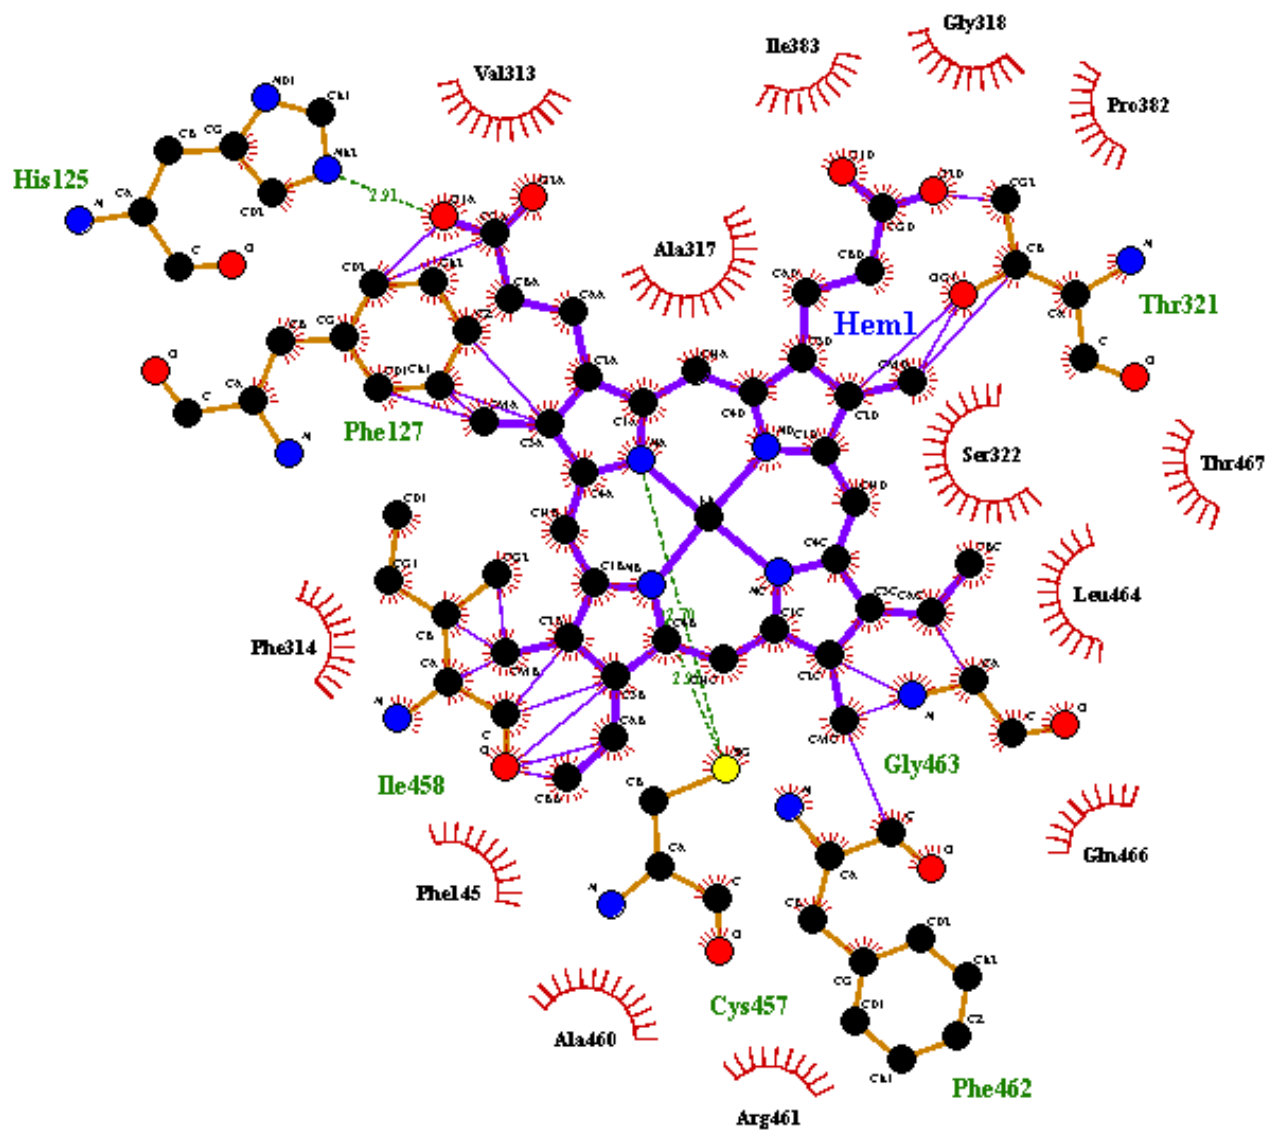

CYP6BK3\_q1 BD TEPP

# Supplementary Figure 11

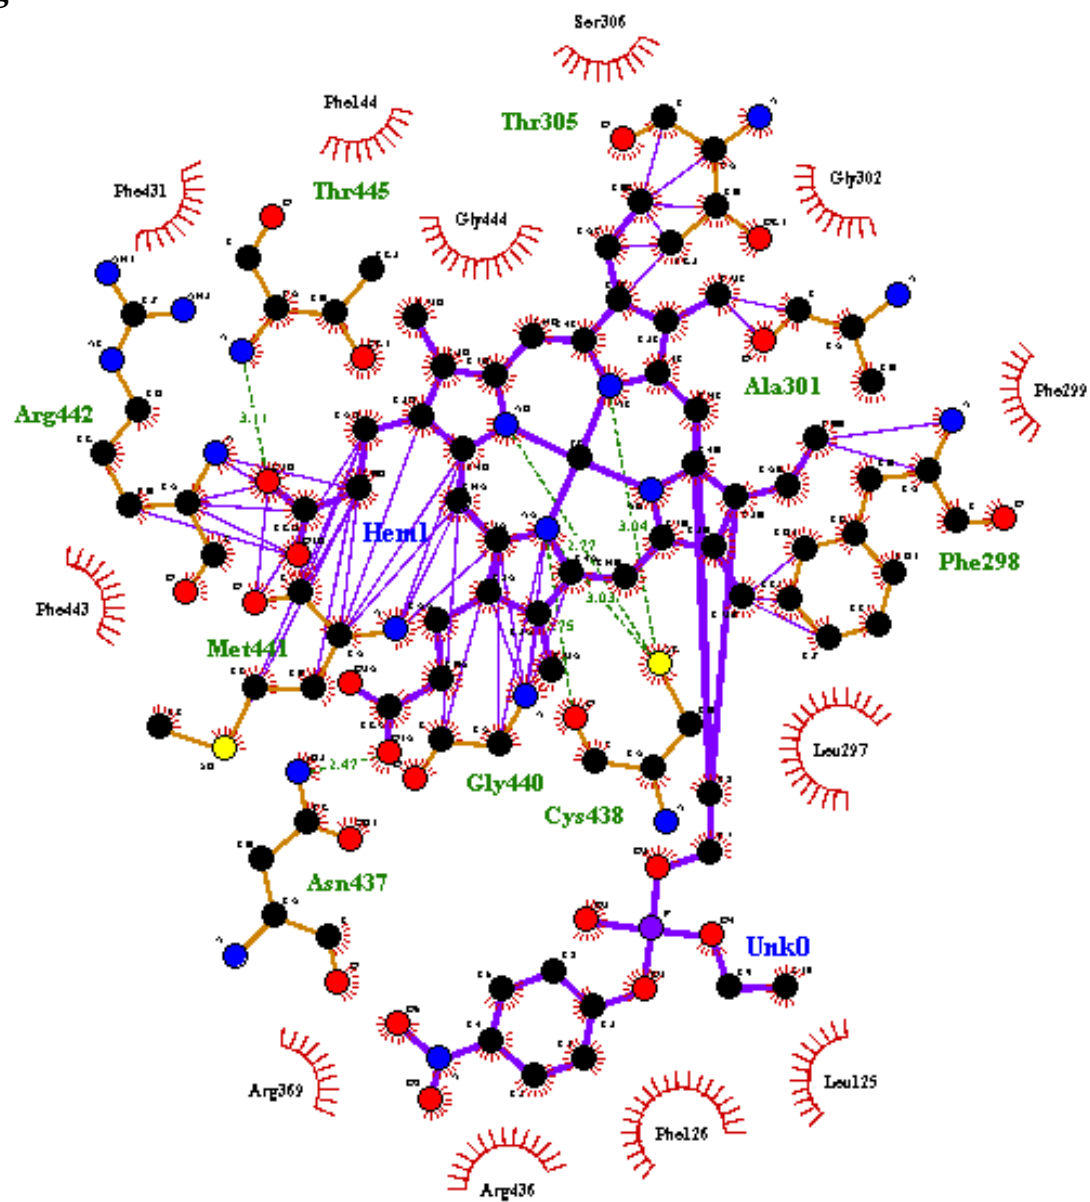

CYP6BR1\_Heme\_Model\_paroaxan

# Supplementary Figure 12

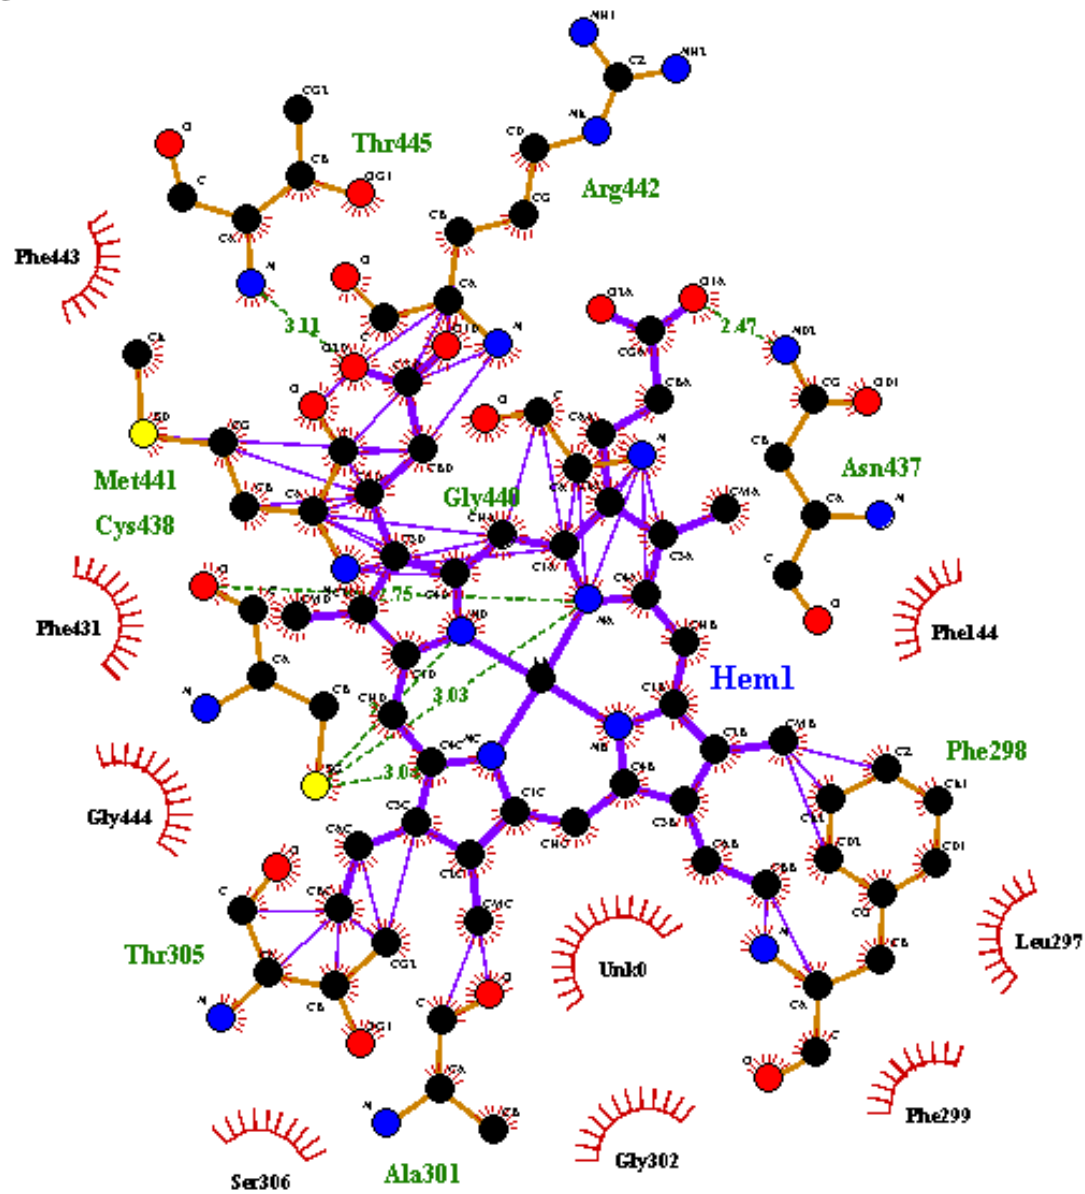

CYP6BR1\_Heme\_Model\_Q1

# Supplementary Figure 13

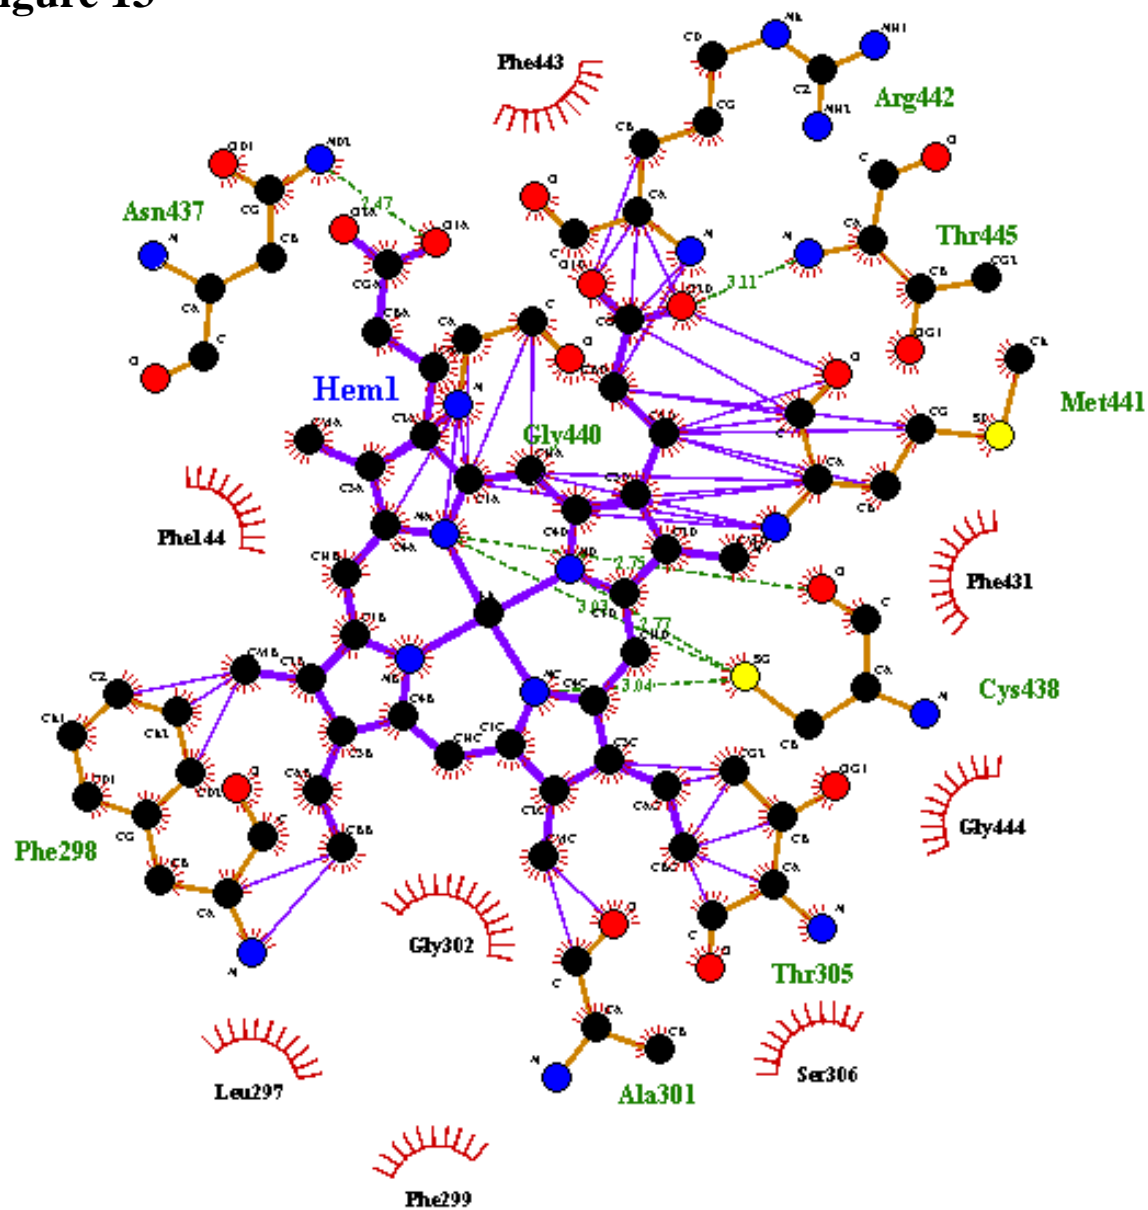

CYP6BR1\_Heme\_Model\_TEPP

# Supplementary Figure 14

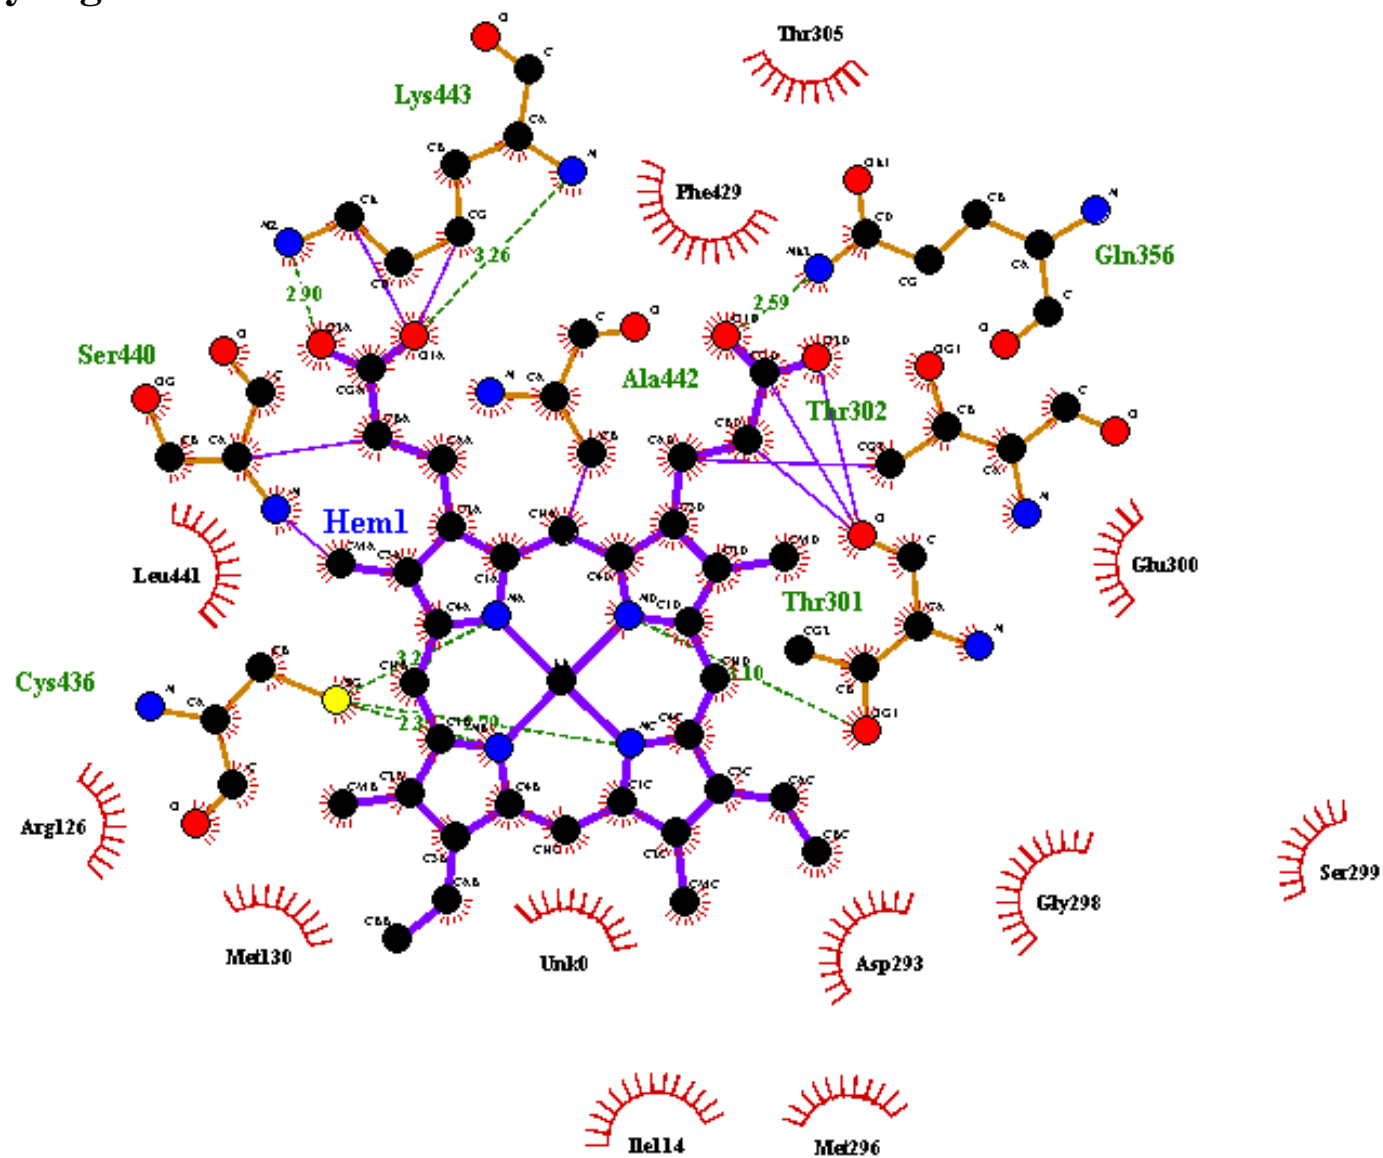

CYP15A1\_Heme\_Model\_paroaxan

# Supplementary Figure 15

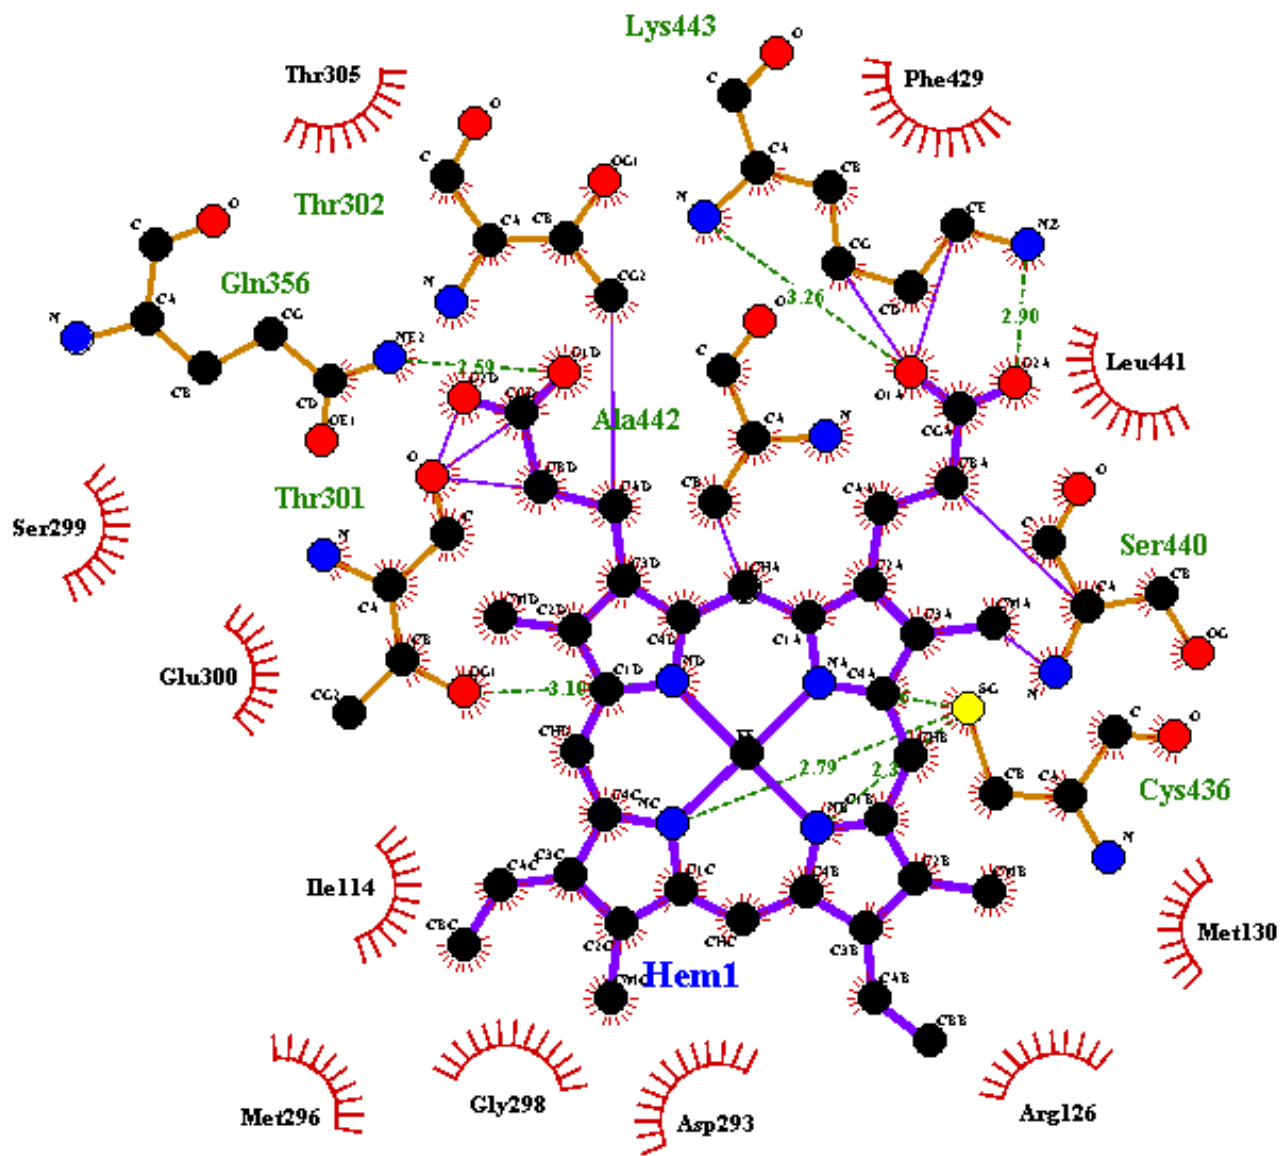

CYP15A1\_Heme\_Model\_Q1

# Supplementary Figure 16

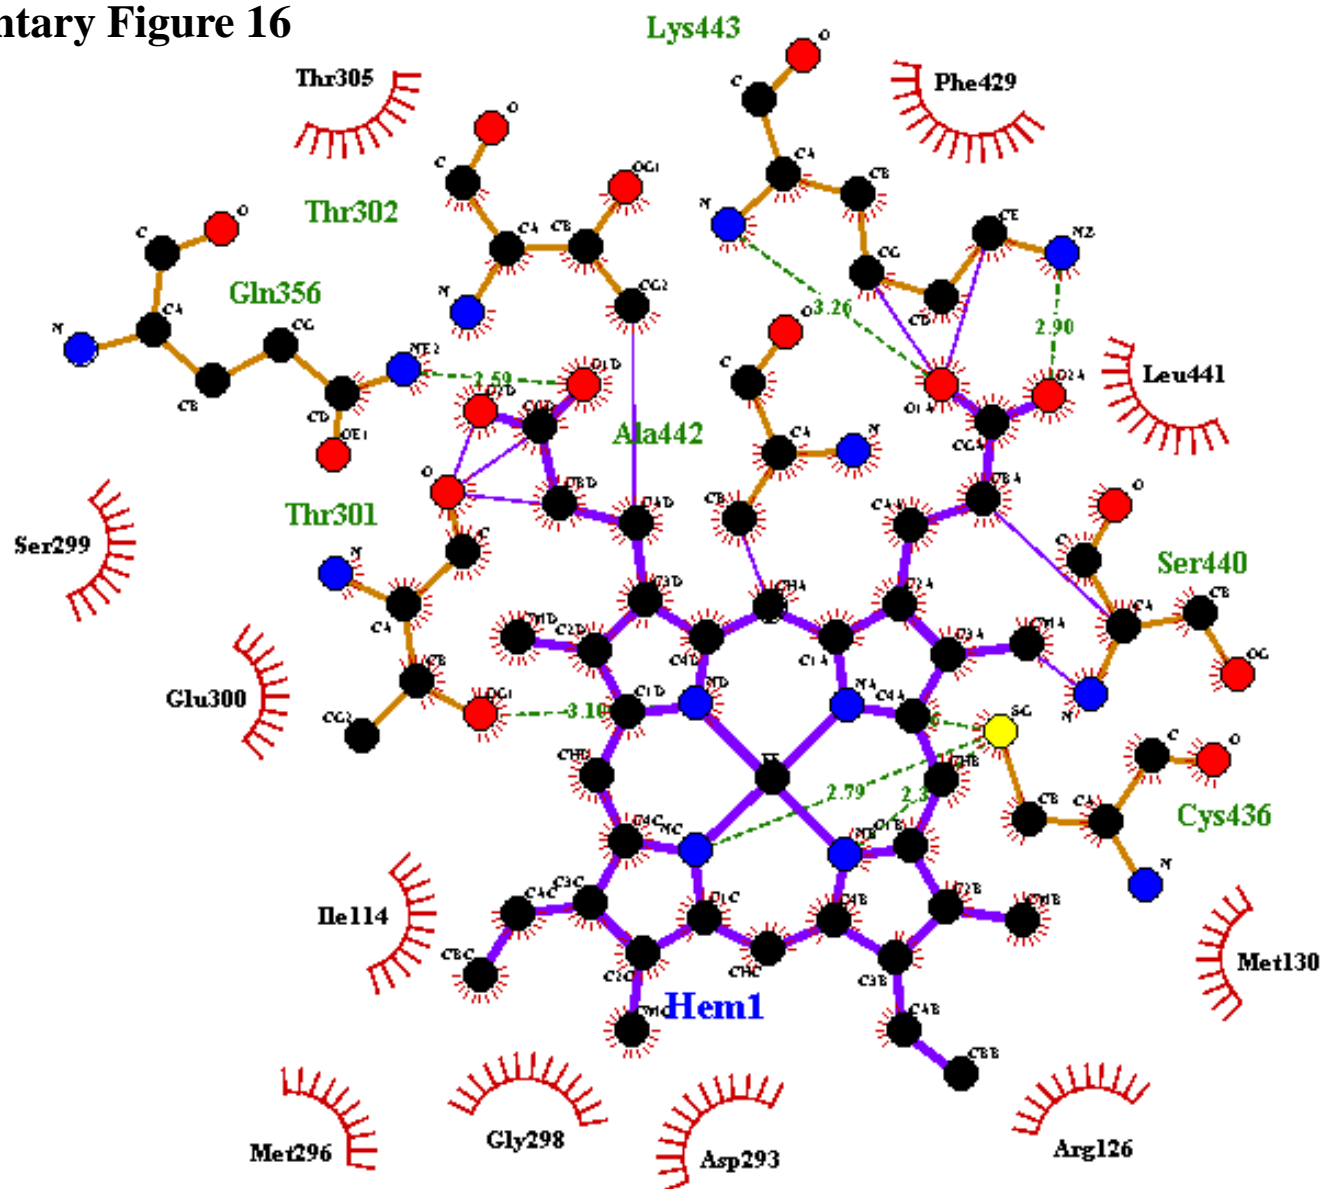

CYP15A1\_Heme\_Model\_TEPP
